# Supplementary material for: MSClustering: A Cytoscape Tool for Multi-Level Clustering of Biological Networks
Source: MDPI journal article supplement (doi:10.3390/ijms232214240), 2022-11-17
Supplement: s1 [file s1]

# Supplementary Information

For “**MSClustering: A Cytoscape tool for multi-level clustering of biological networks**” by BK GE, GM Hu, RHG Chen, and CM Chen

## Table of Contents

- I. Supplementary Results (pages 1-3).
- II. Materials and Methods (pages 4-23).
- III. Manual of the MScClustering app (pages 24-28).

## I. Supplementary Results

Figure S1 demonstrates the validity of MScClustering in clustering large systems (3481 enzyme sequences). In Figure S1, MScClustering divides these enzymes into 7 groups, each corresponding to an EC category. The results of MScClustering are mostly consistent with the EC classification. Compared with state-of-the-art methods, MScClustering is efficient and reliable for clustering large systems. In addition, MScClustering is robust under monotonic transformations of the defined distance between nodes. In Figure S2, we show a drastic change in the clustering results of 197 GPCRs by using the neighbor-joining method for the distance to be (A)  $E^{0.02}$  or (B)  $E$ .

Table S1 gives a comparison of MScClustering with the five most popular clustering plugins in Cytoscape.

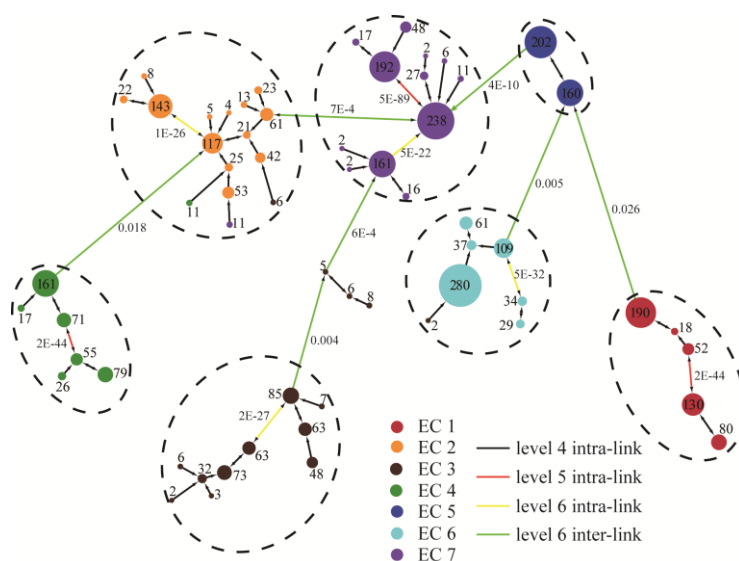

Figure S1. A distance-based phylogenetic tree of the enzyme network by MScClustering. The clustering structure of the network is shown for MSC levels 4-6. Each node is a

level 3 cluster and is colored according to the EC classification of its members. The number on the nodes denotes the number of enzymes in the cluster. The number on the edges between nodes is the smallest  $E$  value between clusters.

(A)  $d = 0.02$

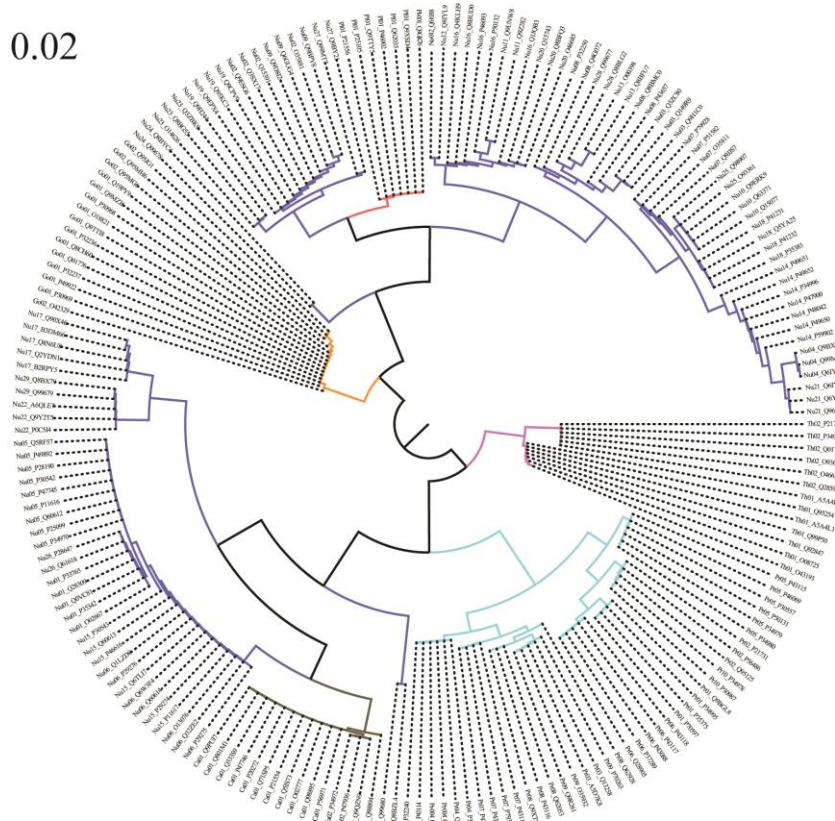

(B)  $d = 1$

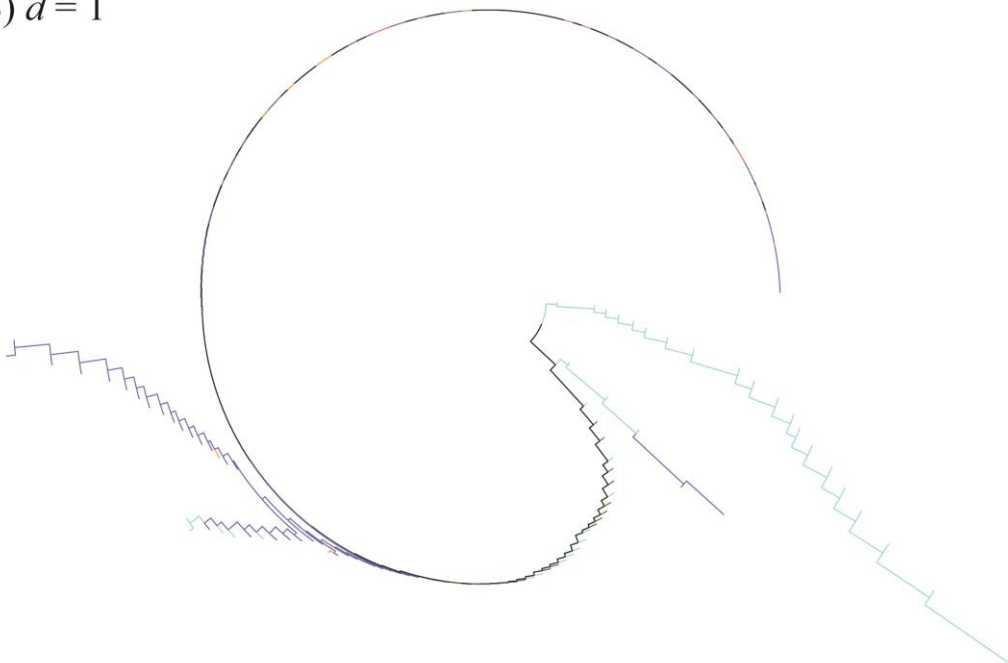

Figure S2. Distance-based phylogenetic trees (polar layout) of the GPCR network constructed by N-J using the distance defined as  $E^{0.02}$  (A) or  $E$  (B), where  $E$  is the BLAST  $E$  value.

Table S1 Comparison of the five most popular clustering plugins in Cytoscape with MScClustering. The download statistics was generated on 2022/11/12.

| Plugin                                                                                                                                                                                                                                                                                                                                                                                                                                                                                                                                                                                                                                                   | Features                                                                                                                                    | Input                      | Clustering Algorithms                                                                                                                                                                                                                                                                                                                                                                                   | Downloads | Average Rating (# of Ratings) |
|----------------------------------------------------------------------------------------------------------------------------------------------------------------------------------------------------------------------------------------------------------------------------------------------------------------------------------------------------------------------------------------------------------------------------------------------------------------------------------------------------------------------------------------------------------------------------------------------------------------------------------------------------------|---------------------------------------------------------------------------------------------------------------------------------------------|----------------------------|---------------------------------------------------------------------------------------------------------------------------------------------------------------------------------------------------------------------------------------------------------------------------------------------------------------------------------------------------------------------------------------------------------|-----------|-------------------------------|
| AutoAnnotate                                                                                                                                                                                                                                                                                                                                                                                                                                                                                                                                                                                                                                             | finds clusters and visually annotates them with labels and groups                                                                           | selected Cytoscape network | MCL[default], Affinity Propagation (AP), Cluster Fuzzifier (CF), Community clustering (CC), Connected Components Clustering (CCC), Spectral Clustering of Protein Sequences (SCPS)                                                                                                                                                                                                                      | 43997     | 5/5 (37)                      |
| clusterMaker2                                                                                                                                                                                                                                                                                                                                                                                                                                                                                                                                                                                                                                            | unifies a variety of algorithms for clustering networks and attributes as well as for ranking clusters based on potentially orthogonal data | selected Cytoscape network | Attribute Clustering:<br>AutoSOME Clustering, Hierarchical Clustering, K-Means Clustering, K-Medoid Clustering, HOPACH Clustering, Partition Around Medoids (PAM) Clustering<br><br>Network Clustering:<br>AP, CF, CCC, CC, Fuzzy C-Means Clustering, MCODE, MCL, SCPS, Leiden Clustering, Transitivity Clustering, Infomap, Fast Greedy, Leading Eigenvector, Label Propagation, Multilevel Clustering | 17618     | 4/5 (23)                      |
| ClusterViz                                                                                                                                                                                                                                                                                                                                                                                                                                                                                                                                                                                                                                               | found cluster can be subjected to GO enrichment analysis.                                                                                   | selected Cytoscape network | FAG-EC, MCODE, EAGLE                                                                                                                                                                                                                                                                                                                                                                                    | 20094     | 4.1/5 (13)                    |
| CytoCluster                                                                                                                                                                                                                                                                                                                                                                                                                                                                                                                                                                                                                                              | analyzes and visualizes clusters from network                                                                                               | selected Cytoscape network | HC-PIN, DCU, OH-PIN, IPCA, IPC-MCE, ClusterONE                                                                                                                                                                                                                                                                                                                                                          | 29568     | 5/5 (12)                      |
| MCODE                                                                                                                                                                                                                                                                                                                                                                                                                                                                                                                                                                                                                                                    | clusters a given network based on topology to find densely connected regions                                                                | selected Cytoscape network | MCODE                                                                                                                                                                                                                                                                                                                                                                                                   | 141356    | 4.5/5 (30)                    |
| MScClustering                                                                                                                                                                                                                                                                                                                                                                                                                                                                                                                                                                                                                                            | an efficient app for hierarchical clustering and phylogenetics of complex networks                                                          | distance matrix            | Minimum span clustering (MSC)                                                                                                                                                                                                                                                                                                                                                                           | 1171      | 5/5 (26)                      |
| Link:<br><a href="https://apps.cytoscape.org/apps/autoannotate">https://apps.cytoscape.org/apps/autoannotate</a> ; <a href="https://apps.cytoscape.org/apps/clustermaker2">https://apps.cytoscape.org/apps/clustermaker2</a> ;<br><a href="https://apps.cytoscape.org/apps/clusterviz">https://apps.cytoscape.org/apps/clusterviz</a> ; <a href="https://apps.cytoscape.org/apps/cytocluster">https://apps.cytoscape.org/apps/cytocluster</a> ;<br><a href="https://apps.cytoscape.org/apps/mcode">https://apps.cytoscape.org/apps/mcode</a> ; <a href="https://apps.cytoscape.org/apps/msclustering">https://apps.cytoscape.org/apps/msclustering</a> ; |                                                                                                                                             |                            |                                                                                                                                                                                                                                                                                                                                                                                                         |           |                               |

## II. Materials and Methods

The MSClustering app is an easy-to-use Cytoscape tool designed to visualize the clustering and phylogenetic information of complex systems. For demonstration, we first applied it to cluster 63 beta coronaviruses (obtained from GISAID and NCBI GenBank, and listed in Table S2) that were previously studied by Jaimes et al. Since amino acid sequences of their S protein were used to calculate the mutual distances between viruses, viruses with identical S protein sequence will have zero distance and be simplified as one node. In total, we have 46 nodes as listed in Table S2.

The alignment of 46 coronaviruses was performed on their S protein sequences using the MAFFT version7. The character-based phylogenetic tree was generated by the best model found with IQ-TREE using maximum-likelihood estimation. Table S3 lists the scores of two popular information criteria, including AIC (Akaike's information criterion) and BIC (Bayesian Information Criterion). Both criteria suggest that, for this case, the WAG (+F, empirical AA frequencies; +R4, default free-rate heterogeneity) model is the best empirical model using maximal likelihood.

Furthermore, we used MSClustering to investigate the phylogenetics of 197 GPCRs as listed in Table S4. In this case study, we used three distance-based methods (MSClustering, N-J, and Louvain) and three character-based methods (IQ-TREE, PhyML, and ProtTest3) to construct the phylogenetic trees. For distance-based methods, we used the BLAST  $E$  value or  $E^{0.02}$  to denote the distance between GPCRs. The results of MSClustering at various characteristic levels are shown in Table S4. Table S5 shows the comparison of GPCRs' clustering results (47 clusters) obtained from MSClustering, N-J, and Louvain.

The MSClustering app was developed based on the MSC algorithm that has been previously used to study various complex networks in biology, literature, finance, and scientometrics. The flow chart of MSC is shown in Figure S3. As a Cytoscape tool, it is freely available and can be used to visualize the hierarchical clustering and phylogenetic information of complex systems. Here, as in the flowchart of Figure S4, we briefly describe the four steps in the MSClustering:

Step 1 (simplification). The MSC algorithm identifies the closest neighbor of each node and records their distances in a list of ascending order from the distance matrix. For a

network of  $N$  nodes, instead of dealing with a distance matrix of  $N^2$  elements, MSC only processes at most  $N$  distances in the list.

Step 2 (clustering). MSC constructs the first cluster by starting from the shortest node pair and then including additional pairs from the list in the order of increasing distance. For the added distance, if one of the two nodes is involved in one of the constructed clusters, the size of this cluster increases but the number of clusters remains the same. If both nodes of the distance are not involved in the above-constructed clusters, a new cluster is identified, and the number of clusters increases. All clusters of the network are found when all distances in the list are considered. The identified clusters in the first run are referred to as the first level clustering, which has the finest resolution.

Step 3 (renormalization). Clusters constructed in step 2 are considered renormalized nodes, and the distance between clusters is calculated by finding the shortest distance of inter-cluster node pairs between two clusters. The network consisting of these renormalized components is further clustered by steps 1-2, and higher levels of clustering with a lower resolution are constructed. Steps 1 and 2 are repeated until the number of groups is smaller than  $N_{\text{limit}}$ .

Step 4 (outlier detection). For high-level (late-stage) clustering, the number of renormalized nodes is small and the consistency of predicted clusters is reduced due to the inclusion of outliers. A renormalized node is considered an outlier if its shortest distance to other nodes is larger than  $m \times L_{\text{med}}$ , where  $m$  is the threshold parameter and  $L_{\text{med}}$  is the median of the shortest distance list. MSClustering will detect outliers for the last two levels of clustering, and each outlier forms a cluster by itself.

Figure S5 is a demonstration of using MSClustering to visualize the hierarchical clustering of the beta coronavirus network at various levels of resolution (A) and its distance-based phylogenetic tree (B).

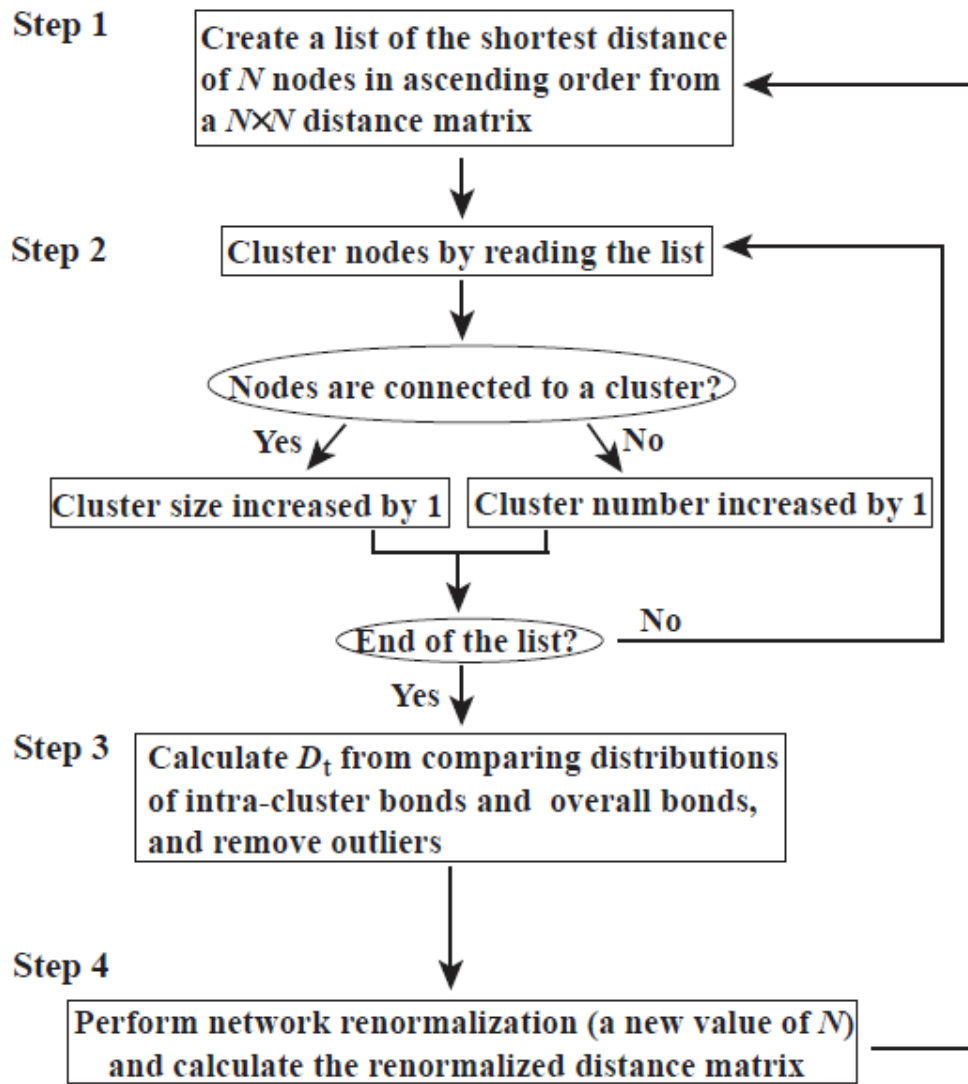

Figure S3. Flowchart of the MSC algorithm.

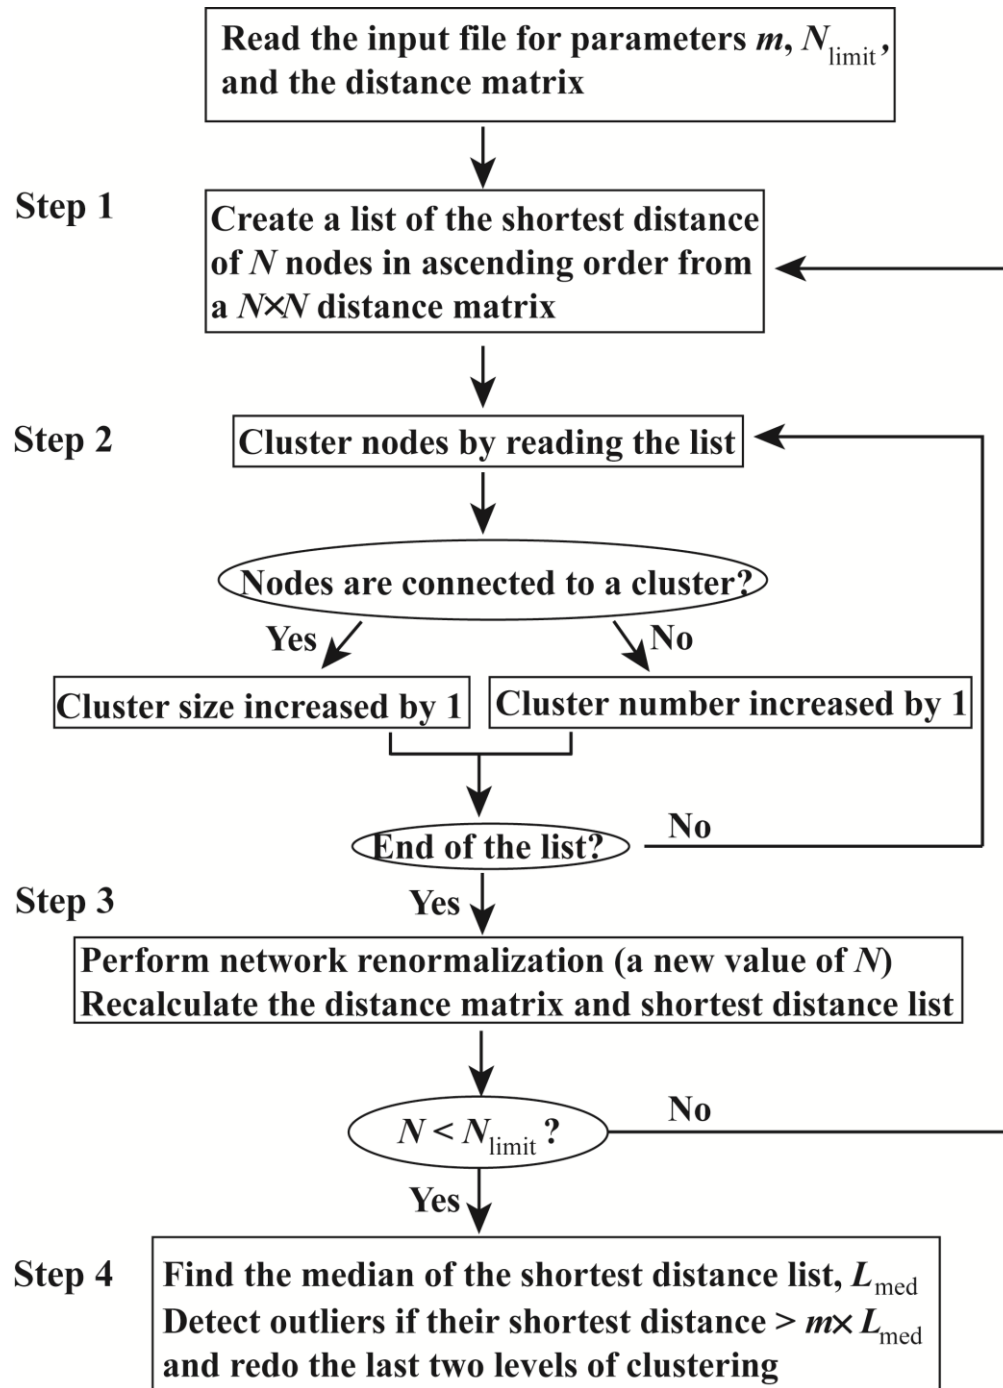

Figure S4. Flowchart of the MSClustering app.

(A)

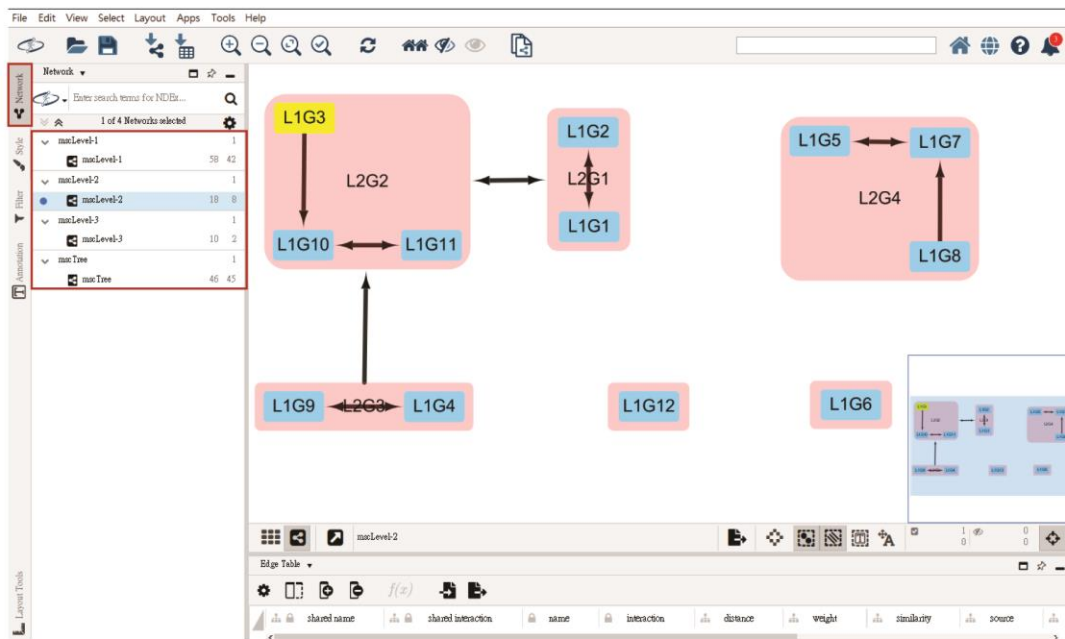

(B)

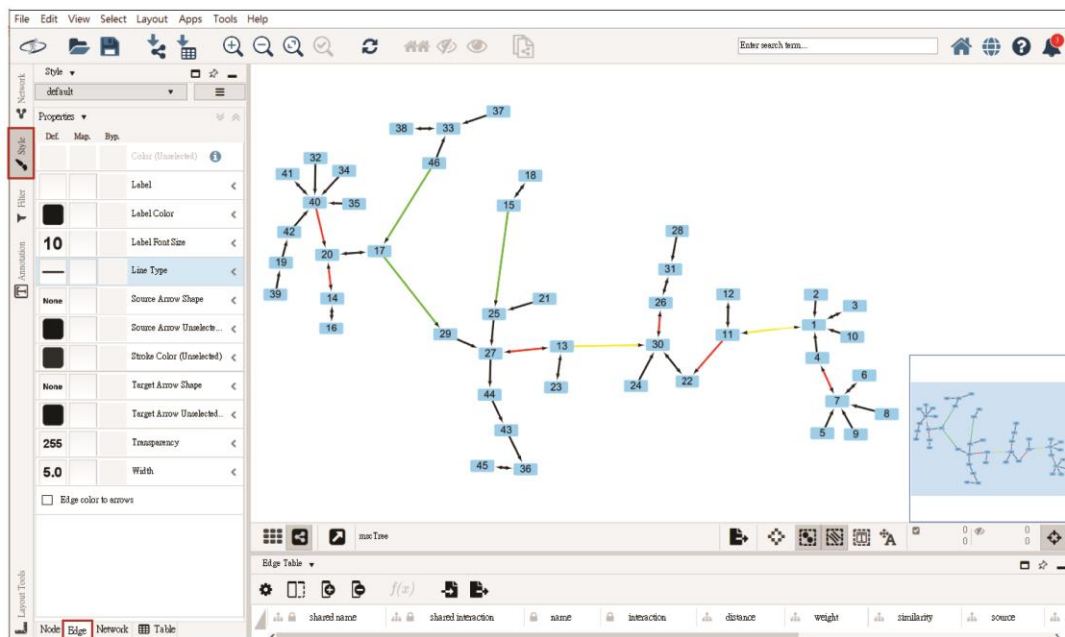

Figure S5. Demonstration of MSClustering for the multi-level clustering (A) and the MSC tree (B). We show the Network panel in (A) and the Style panel in (B).



Table S2. 63 betacoronavirus sequences in the target dataset. Betacoronaviruses with the same S protein sequence are colored in red and labeled by the same node ID.

| Sequence label                       | Accession ID   | Node ID |
|--------------------------------------|----------------|---------|
| SARS-CoV-2-Foshan                    | EPI_ISL_406535 | 1       |
| SARS-CoV-2-Foshan                    | EPI_ISL_406534 | 1       |
| SARS-CoV-2-Guangdong                 | EPI_ISL_406538 | 1       |
| SARS-CoV-2-Guangzhou                 | EPI_ISL_406533 | 1       |
| SARS-CoV-2-Nonthaburi                | EPI_ISL_403962 | 1       |
| SARS-CoV-2-Shenzhen                  | EPI_ISL_405839 | 1       |
| SARS-CoV-2-Taiwan                    | EPI_ISL_406031 | 1       |
| SARS-CoV-2-USA-CA1                   | EPI_ISL_406034 | 1       |
| SARS-CoV-2-USA-WA1                   | EPI_ISL_404895 | 1       |
| SARS-CoV-2-Wuhan-WIV06               | EPI_ISL_402129 | 1       |
| SARS-CoV-2-Zhejiang                  | EPI_ISL_404228 | 1       |
| BetaCoV/Wuhan/IVDC-HB-envF13-20/2020 | EPI_ISL_408514 | 1       |
| BetaCoV/Wuhan/IVDC-HB-envF13-21/2020 | EPI_ISL_408515 | 1       |
| SARS-CoV-2-Wuhan-Hu1                 | MN908947.3     | 1       |
| SARS-CoV-2-France                    | EPI_ISL_406596 | 2       |
| SARS-CoV-2-USA-IL1                   | EPI_ISL_404253 | 3       |
| Bat-SL-RaTG13                        | EPI_ISL_402131 | 4       |
| BetaCoV/pangolin/Guangxi/P5E/2017    | EPI_ISL_410541 | 5       |
| Beta-CoV/pangolin/Guangxi/P2V/2017   | EPI_ISL_410542 | 6       |
| BetaCoV/pangolin/Guangxi/P5L/2017    | EPI_ISL_410540 | 7       |
| Beta-CoV/pangolin/Guangxi/P4L/2017   | EPI_ISL_410538 | 8       |
| BetaCoV/pangolin/Guangxi/P1E/2017    | EPI_ISL_410539 | 9       |
| BetaCoV/Wuhan/IVDC-HB-envF13/2020    | EPI_ISL_408511 | 10      |
| Bat-SL-CoVZC45                       | MG772933.1     | 11      |
| Bat-SL-CoVZXC21                      | MG772934.1     | 12      |
| Bat-SL-LYRa3                         | KF569997.1     | 13      |
| BatCoV/133                           | DQ648794.1     | 14      |
| BatCoV-GCCDC1                        | NC_030886.1    | 15      |
| BatCoV-HKU4-1                        | EF065505.1     | 16      |
| BatCoV-HKU5-1                        | EF065509.1     | 17      |
| BatCoV-HKU9                          | NC_009021.1    | 18      |
| BatCoV-Neo/PML-PHE1/RSA              | KC869678.4     | 19      |
| BtVs-BetaCoV/SC2013                  | KJ473821.1     | 20      |
| Bat-CoV-BM48-31                      | NC_014470.1    | 21      |
| Bat-SL-HKU3-1                        | DQ022305.2     | 22      |
| Bat-SL-LYRa11                        | KF569996.1     | 23      |
| Bat-SL-Rf1                           | DQ412042.1     | 24      |
| Bat-SL-Rs4231                        | KY417146.1     | 25      |

|                         |             |    |
|-------------------------|-------------|----|
| Bat-SL-Rs4255           | KY417149.1  | 26 |
| Bat-SL-Rs4874           | KY417150.1  | 27 |
| Bat-SL-RS672            | FJ588686.1  | 28 |
| Bat-SL-WIV1             | KC881007.1  | 29 |
| BtRs-BetaCoV/YN2018C    | MK211377.1  | 30 |
| BtRs-BetaCoV/YN2018D    | MK211378.1  | 31 |
| camMERS-CoV-HKFU-HKU-13 | KJ650295.1  | 32 |
| camMERS-CoV-HKU23       | KF906251.1  | 33 |
| camMERS-CoV-KSA-505     | KJ713295.1  | 33 |
| amMERS-CoV-NRCE-HKU205  | KJ477102.1  | 34 |
| camMERS-CoV-NRCE-HKU270 | KJ477103.2  | 35 |
| CivSARS-CoV-SZ3         | P59594.1    | 36 |
| hSARS-CoVHKU39849       | JN854286.1  | 36 |
| HCoV-HKU1               | AY597011.2  | 37 |
| HCoV-OC43               | KF963244.1  | 38 |
| Hedgehog-CoV/VMC/DEU    | KC545383.1  | 39 |
| hMERSCoV-EMC/2012       | JX869059.2  | 40 |
| hMERS-CoV-England-1     | KC164505.2  | 41 |
| hMERS-CoV-Jordan-N3     | KC776174.1  | 42 |
| hSARS-CoV-BJ01          | AY278488.2  | 43 |
| hSARS-CoV-GZ02          | AY390556.1  | 44 |
| hSARS-CoV-Tor2          | NC_004718.3 | 45 |
| MHV-A59                 | M18379.1    | 46 |

Table S3. Scores of AIC and BIC for the phylogenetic tree of the system constructed by various evolution models.

| <b>Model</b>  | <b>AIC</b> | <b>BIC</b> |
|---------------|------------|------------|
| WAG+F+R4      | 72139.45   | 72750.28   |
| LG+F+R4       | 72329.65   | 72940.48   |
| VT+F+R4       | 72331.02   | 72941.85   |
| Blosum62+F+R4 | 72454.11   | 73064.94   |
| PMB+F+R4      | 72496.5    | 73107.33   |
| WAG+R4        | 72626.63   | 73135.66   |
| VT+R4         | 72672.69   | 73181.72   |
| JTTDCMut+F+R4 | 72621.21   | 73232.05   |
| JTT+F+R4      | 72630.68   | 73241.52   |
| rtREV+F+R4    | 72651.74   | 73262.57   |
| LG+R4         | 72757.33   | 73266.36   |
| LG+R5         | 72760.68   | 73280.42   |
| LG+I+G4       | 72793.37   | 73280.96   |
| LG+G4         | 72825.56   | 73307.8    |
| LG+R3         | 72840.31   | 73338.62   |
| DCMut+F+R4    | 72737.88   | 73348.72   |
| Dayhoff+F+R4  | 72742.58   | 73353.42   |
| cpREV+F+R4    | 72833.28   | 73444.11   |
| PMB+R4        | 73000.55   | 73509.58   |
| FLU+F+R4      | 72908.2    | 73519.04   |
| JTTDCMut+R4   | 73022.78   | 73531.81   |
| JTT+R4        | 73037.16   | 73546.19   |
| Blosum62+R4   | 73048.55   | 73557.58   |
| cpREV+R4      | 73199.37   | 73708.4    |
| LG+R2         | 73258.75   | 73746.35   |
| mtInv+F+R4    | 73234.3    | 73845.13   |
| rtREV+R4      | 73401.73   | 73910.76   |
| FLU+R4        | 73420.91   | 73929.93   |
| DCMut+R4      | 73478.3    | 73987.33   |
| Dayhoff+R4    | 73483.11   | 73992.14   |
| mtREV+F+R4    | 73564.96   | 74175.8    |
| mtMet+F+R4    | 73733      | 74343.84   |
| mtZOA+F+R4    | 73752.31   | 74363.15   |
| HIVb+F+R4     | 74082.96   | 74693.8    |
| LG+I          | 74406.65   | 74888.88   |
| mtVer+F+R4    | 74482.15   | 75092.99   |
| mtART+F+R4    | 74560.09   | 75170.93   |
| HIVb+R4       | 74918.79   | 75427.82   |

|            |          |          |
|------------|----------|----------|
| mtMAM+F+R4 | 75011.49 | 75622.33 |
| HIVw+F+R4  | 75059.14 | 75669.98 |
| mtZOA+R4   | 75419.35 | 75928.38 |
| LG         | 75454.13 | 75931.01 |
| mtMet+R4   | 75609.72 | 76118.75 |
| mtREV+R4   | 75652.16 | 76161.19 |
| mtInv+R4   | 75849.55 | 76358.58 |
| mtVer+R4   | 76398.3  | 76907.32 |
| HIVw+R4    | 76520.32 | 77029.34 |
| mtART+R4   | 76550.43 | 77059.46 |
| mtMAM+R4   | 77340.9  | 77849.93 |

---

Table S4. Details of 197 GPCR sequences and their multi-level MSC clustering. Here protein type is obtained from GPCRdb and protein information is obtained from UniProtKB.

| MSC 4 | MSC 2 | MSC 1 | Uniprot ID | Protein type               | protein information                 |
|-------|-------|-------|------------|----------------------------|-------------------------------------|
| I     | 1     | PI01  | P21556     | Platelet-activating factor | Platelet-activating factor receptor |
| I     | 1     | PI01  | Q9TTY5     | Platelet-activating factor | Platelet-activating factor receptor |
| I     | 1     | PI01  | Q62035     | Platelet-activating factor | Platelet-activating factor receptor |
| I     | 1     | PI01  | Q9XSD4     | Platelet-activating factor | Platelet-activating factor receptor |
| I     | 1     | PI01  | P25105     | Platelet-activating factor | Platelet-activating factor receptor |
| I     | 1     | PI01  | Q9GK76     | Platelet-activating factor | Platelet-activating factor receptor |
| I     | 1     | PI01  | P46002     | Platelet-activating factor | Platelet-activating factor receptor |
| I     | 1     | Nu08  | Q8BMC0     | Nucleotide-like            | P2Y5/LPA6                           |
| I     | 1     | Nu08  | P43657     | Nucleotide-like            | P2Y5/LPA6                           |
| I     | 1     | Nu08  | Q4G072     | Nucleotide-like            | P2Y5/LPA6                           |
| I     | 1     | Nu08  | P32250     | Nucleotide-like            | P2Y5/LPA6                           |
| I     | 1     | Nu03  | Q149R9     | Nucleotide-like            | GPR92/LPA5                          |
| I     | 1     | Nu03  | Q3ZC80     | Nucleotide-like            | GPR92/LPA5                          |
| I     | 1     | Nu03  | Q9H1C0     | Nucleotide-like            | GPR92/LPA5                          |
| I     | 1     | Nu28  | Q8BLG2     | Nucleotide-like            | P2Y9/LPA4                           |
| I     | 1     | Nu28  | Q99677     | Nucleotide-like            | P2Y9/LPA4                           |
| I     | 1     | Nu13  | O00398     | Nucleotide-like            | P2Y10                               |
| I     | 1     | Nu13  | Q8BFU7     | Nucleotide-like            | P2Y10                               |
| I     | 1     | Nu24  | Q99678     | Nucleotide-like            | GPR20                               |
| I     | 1     | Nu24  | Q8BYC4     | Nucleotide-like            | GPR20                               |
| I     | 2     | Nu19  | Q9CPV9     | Nucleotide-like            | P2Y12                               |
| I     | 2     | Nu19  | Q9H244     | Nucleotide-like            | P2Y12                               |
| I     | 2     | Nu19  | Q9EPX4     | Nucleotide-like            | P2Y12                               |
| I     | 2     | Nu19  | Q95KC3     | Nucleotide-like            | P2Y12                               |
| I     | 2     | Nu02  | Q9ESG6     | Nucleotide-like            | P2Y14                               |
| I     | 2     | Nu02  | O35881     | Nucleotide-like            | P2Y14                               |
| I     | 2     | Nu02  | Q3SX17     | Nucleotide-like            | P2Y14                               |
| I     | 2     | Nu02  | Q15391     | Nucleotide-like            | P2Y14                               |
| I     | 2     | Nu09  | Q9D8I2     | Nucleotide-like            | P2Y13                               |
| I     | 2     | Nu09  | Q6GUG4     | Nucleotide-like            | P2Y13                               |
| I     | 2     | Nu09  | Q9BPV8     | Nucleotide-like            | P2Y13                               |
| I     | 2     | Nu23  | Q8BG55     | Nucleotide-like            | GPR171                              |
| I     | 2     | Nu23  | Q3ZBK9     | Nucleotide-like            | GPR171                              |
| I     | 2     | Nu23  | O14626     | Nucleotide-like            | GPR171                              |
| I     | 2     | Nu27  | Q99MT7     | Nucleotide-like            | GPR87                               |
| I     | 2     | Nu27  | Q9BY21     | Nucleotide-like            | GPR87                               |
| I     | 3     | Nu14  | P49651     | Nucleotide-like            | P2Y1                                |

|    |    |      |        |                 |                           |
|----|----|------|--------|-----------------|---------------------------|
| I  | 3  | Nu14 | P34996 | Nucleotide-like | P2Y1                      |
| I  | 3  | Nu14 | P49650 | Nucleotide-like | P2Y1                      |
| I  | 3  | Nu14 | P49652 | Nucleotide-like | P2Y1                      |
| I  | 3  | Nu14 | P47900 | Nucleotide-like | P2Y1                      |
| I  | 3  | Nu14 | P48042 | Nucleotide-like | P2Y1                      |
| I  | 3  | Nu14 | P59902 | Nucleotide-like | P2Y1                      |
| I  | 3  | Nu07 | Q9JJS7 | Nucleotide-like | P2Y4                      |
| I  | 3  | Nu07 | P51582 | Nucleotide-like | P2Y4                      |
| I  | 3  | Nu07 | O35811 | Nucleotide-like | P2Y4                      |
| I  | 3  | Nu07 | P79928 | Nucleotide-like | P2Y4                      |
| I  | 3  | Nu18 | P41232 | Nucleotide-like | P2Y2                      |
| I  | 3  | Nu18 | Q5YA25 | Nucleotide-like | P2Y2                      |
| I  | 3  | Nu18 | P41231 | Nucleotide-like | P2Y2                      |
| I  | 3  | Nu18 | P35383 | Nucleotide-like | P2Y2                      |
| I  | 3  | Nu04 | Q99MT6 | Nucleotide-like | Succinate receptors       |
| I  | 3  | Nu04 | Q6IYF9 | Nucleotide-like | Succinate receptors       |
| I  | 3  | Nu04 | Q9BXA5 | Nucleotide-like | Succinate receptors       |
| I  | 3  | Nu21 | Q6IYF8 | Nucleotide-like | 2-oxoglutarate receptor 1 |
| I  | 3  | Nu21 | Q6Y1R5 | Nucleotide-like | 2-oxoglutarate receptor 1 |
| I  | 3  | Nu21 | Q96P68 | Nucleotide-like | 2-oxoglutarate receptor 1 |
| I  | 4  | Nu16 | Q8BUD0 | Nucleotide-like | GPR4                      |
| I  | 4  | Nu16 | Q4KLH9 | Nucleotide-like | GPR4                      |
| I  | 4  | Nu16 | Q1JQB3 | Nucleotide-like | GPR4                      |
| I  | 4  | Nu16 | P46093 | Nucleotide-like | GPR4                      |
| I  | 4  | Nu16 | P50132 | Nucleotide-like | GPR4                      |
| I  | 4  | Nu20 | Q8BFQ3 | Nucleotide-like | Ovarian cancer GPCR 1     |
| I  | 4  | Nu20 | O46685 | Nucleotide-like | Ovarian cancer GPCR 1     |
| I  | 4  | Nu20 | Q15743 | Nucleotide-like | Ovarian cancer GPCR 1     |
| I  | 4  | Nu11 | Q9UNW8 | Nucleotide-like | GPR132                    |
| I  | 4  | Nu11 | Q9Z282 | Nucleotide-like | GPR132                    |
| I  | 4  | Nu12 | Q61038 | Nucleotide-like | Psychosine receptor       |
| I  | 4  | Nu12 | Q8IYL9 | Nucleotide-like | Psychosine receptor       |
| I  | 12 | Nu10 | Q9ERK9 | Nucleotide-like | P2Y6                      |
| I  | 12 | Nu10 | Q63371 | Nucleotide-like | P2Y6                      |
| I  | 12 | Nu10 | Q15077 | Nucleotide-like | P2Y6                      |
| I  | 12 | Nu25 | Q98907 | Nucleotide-like | P2Y3                      |
| I  | 12 | Nu25 | O93361 | Nucleotide-like | P2Y3                      |
| II | 5  | Nu05 | P28190 | Nucleotide-like | Adenosine receptor A1     |
| II | 5  | Nu05 | P11616 | Nucleotide-like | Adenosine receptor A1     |
| II | 5  | Nu05 | P49892 | Nucleotide-like | Adenosine receptor A1     |
| II | 5  | Nu05 | P34970 | Nucleotide-like | Adenosine receptor A1     |

|     |   |      |        |                 |                                 |
|-----|---|------|--------|-----------------|---------------------------------|
| II  | 5 | Nu05 | P47745 | Nucleotide-like | Adenosine receptor A1           |
| II  | 5 | Nu05 | Q5RF57 | Nucleotide-like | Adenosine receptor A1           |
| II  | 5 | Nu05 | Q60612 | Nucleotide-like | Adenosine receptor A1           |
| II  | 5 | Nu05 | P30542 | Nucleotide-like | Adenosine receptor A1           |
| II  | 5 | Nu05 | P25099 | Nucleotide-like | Adenosine receptor A1           |
| II  | 5 | Nu01 | Q0VC81 | Nucleotide-like | Adenosine receptor A3           |
| II  | 5 | Nu01 | O02667 | Nucleotide-like | Adenosine receptor A3           |
| II  | 5 | Nu01 | P33765 | Nucleotide-like | Adenosine receptor A3           |
| II  | 5 | Nu01 | P35342 | Nucleotide-like | Adenosine receptor A3           |
| II  | 5 | Nu01 | Q28309 | Nucleotide-like | Adenosine receptor A3           |
| II  | 5 | Nu26 | Q61618 | Nucleotide-like | Adenosine receptor A3           |
| II  | 5 | Nu26 | P28647 | Nucleotide-like | Adenosine receptor A3           |
| II  | 5 | Nu30 | Q8BZL4 | Nucleotide-like | GPR22                           |
| II  | 5 | Nu30 | Q99680 | Nucleotide-like | GPR22                           |
| II  | 8 | Nu06 | Q60614 | Nucleotide-like | Adenosine receptor A2b          |
| II  | 8 | Nu06 | P29276 | Nucleotide-like | Adenosine receptor A2b          |
| II  | 8 | Nu06 | P29275 | Nucleotide-like | Adenosine receptor A2b          |
| II  | 8 | Nu06 | Q32ZE2 | Nucleotide-like | Adenosine receptor A2b          |
| II  | 8 | Nu06 | Q1LZD0 | Nucleotide-like | Adenosine receptor A2b          |
| II  | 8 | Nu06 | O13076 | Nucleotide-like | Adenosine receptor A2b          |
| II  | 8 | Nu06 | Q6W3F4 | Nucleotide-like | Adenosine receptor A2b          |
| II  | 8 | Nu15 | P29274 | Nucleotide-like | Adenosine receptor A2a          |
| II  | 8 | Nu15 | P11617 | Nucleotide-like | Adenosine receptor A2a          |
| II  | 8 | Nu15 | P30543 | Nucleotide-like | Adenosine receptor A2a          |
| II  | 8 | Nu15 | Q60613 | Nucleotide-like | Adenosine receptor A2a          |
| II  | 8 | Nu15 | Q6TLI7 | Nucleotide-like | Adenosine receptor A2a          |
| II  | 8 | Nu15 | P46616 | Nucleotide-like | Adenosine receptor A2a          |
| II  | 8 | Nu17 | B3DM66 | Nucleotide-like | GPR161                          |
| II  | 8 | Nu17 | B2RPY5 | Nucleotide-like | GPR161                          |
| II  | 8 | Nu17 | Q90X46 | Nucleotide-like | GPR161                          |
| II  | 8 | Nu17 | Q8N6U8 | Nucleotide-like | GPR161                          |
| II  | 8 | Nu17 | Q2YDN1 | Nucleotide-like | GPR161                          |
| III | 6 | Pr05 | P43115 | Prostanoid      | Prostaglandin E2 receptor EP3   |
| III | 6 | Pr05 | P50131 | Prostanoid      | Prostaglandin E2 receptor EP3   |
| III | 6 | Pr05 | P46069 | Prostanoid      | Prostaglandin E2 receptor EP3   |
| III | 6 | Pr05 | P34979 | Prostanoid      | Prostaglandin E2 receptor EP3   |
| III | 6 | Pr05 | P34980 | Prostanoid      | Prostaglandin E2 receptor EP3   |
| III | 6 | Pr05 | P30557 | Prostanoid      | Prostaglandin E2 receptor EP3   |
| III | 6 | Pr06 | P43088 | Prostanoid      | Prostaglandin F2-alpha receptor |
| III | 6 | Pr06 | P37289 | Prostanoid      | Prostaglandin F2-alpha receptor |
| III | 6 | Pr06 | P43117 | Prostanoid      | Prostaglandin F2-alpha receptor |

|     |    |      |        |                                                |                                             |
|-----|----|------|--------|------------------------------------------------|---------------------------------------------|
| III | 6  | Pr06 | P43118 | Prostanoid                                     | Prostaglandin F2-alpha receptor             |
| III | 6  | Pr06 | Q28905 | Prostanoid                                     | Prostaglandin F2-alpha receptor             |
| III | 6  | Pr01 | P35375 | Prostanoid                                     | Prostaglandin E2 receptor EP1               |
| III | 6  | Pr01 | P34995 | Prostanoid                                     | Prostaglandin E2 receptor EP1               |
| III | 6  | Pr01 | Q9BGL8 | Prostanoid                                     | Prostaglandin E2 receptor EP1               |
| III | 6  | Pr01 | P70597 | Prostanoid                                     | Prostaglandin E2 receptor EP1               |
| III | 14 | Pr02 | Q95125 | Prostanoid                                     | Thromboxane A2 receptor                     |
| III | 14 | Pr02 | P21731 | Prostanoid                                     | Thromboxane A2 receptor                     |
| III | 14 | Pr02 | P56486 | Prostanoid                                     | Thromboxane A2 receptor                     |
| III | 14 | Pr10 | P34978 | Prostanoid                                     | Thromboxane A2 receptor                     |
| III | 14 | Pr10 | P30987 | Prostanoid                                     | Thromboxane A2 receptor                     |
| III | 7  | Pr04 | P43114 | Prostanoid                                     | Prostaglandin E2 receptor EP4               |
| III | 7  | Pr04 | P32240 | Prostanoid                                     | Prostaglandin E2 receptor EP4               |
| III | 7  | Pr04 | Q95KZ0 | Prostanoid                                     | Prostaglandin E2 receptor EP4               |
| III | 7  | Pr04 | Q8MJ08 | Prostanoid                                     | Prostaglandin E2 receptor EP4               |
| III | 7  | Pr04 | P35408 | Prostanoid                                     | Prostaglandin E2 receptor EP4               |
| III | 7  | Pr04 | Q28691 | Prostanoid                                     | Prostaglandin E2 receptor EP4               |
| III | 7  | Pr08 | Q62928 | Prostanoid                                     | Prostaglandin E2 receptor EP2               |
| III | 7  | Pr08 | Q62053 | Prostanoid                                     | Prostaglandin E2 receptor EP2               |
| III | 7  | Pr08 | P43116 | Prostanoid                                     | Prostaglandin E2 receptor EP2               |
| III | 7  | Pr08 | Q9XT82 | Prostanoid                                     | Prostaglandin E2 receptor EP2               |
| III | 7  | Pr07 | P79393 | Prostanoid                                     | Prostaglandin I2 receptor                   |
| III | 7  | Pr07 | P43119 | Prostanoid                                     | Prostaglandin I2 receptor                   |
| III | 7  | Pr07 | P43252 | Prostanoid                                     | Prostaglandin I2 receptor                   |
| III | 7  | Pr07 | P43253 | Prostanoid                                     | Prostaglandin I2 receptor                   |
| III | 15 | Pr09 | O35932 | Prostanoid                                     | Prostaglandin D2 receptor                   |
| III | 15 | Pr09 | Q9R261 | Prostanoid                                     | Prostaglandin D2 receptor                   |
| III | 15 | Pr09 | P70263 | Prostanoid                                     | Prostaglandin D2 receptor                   |
| III | 15 | Pr03 | A5D7K8 | Prostanoid                                     | Prostaglandin D2 receptor                   |
| III | 15 | Pr03 | Q13258 | Prostanoid                                     | Prostaglandin D2 receptor                   |
| IV  | 9  | Th01 | O08725 | Thyrotropin-releasing hormone and Secretagogue | Growth hormone secretagogue receptor type 1 |
| IV  | 9  | Th01 | O43193 | Thyrotropin-releasing hormone and Secretagogue | Growth hormone secretagogue receptor type 1 |
| IV  | 9  | Th01 | Q99P50 | Thyrotropin-releasing hormone and Secretagogue | Growth hormone secretagogue receptor type 1 |
| IV  | 9  | Th01 | A5A4L1 | Thyrotropin-releasing hormone and Secretagogue | Growth hormone secretagogue receptor type 1 |
| IV  | 9  | Th01 | A5A4K9 | Thyrotropin-releasing hormone and Secretagogue | Growth hormone secretagogue receptor type 1 |
| IV  | 9  | Th01 | Q92847 | Thyrotropin-releasing hormone and Secretagogue | Growth hormone secretagogue receptor type 1 |
| IV  | 9  | Th01 | Q95254 | Thyrotropin-releasing hormone and Secretagogue | Growth hormone secretagogue receptor type 1 |
| IV  | 9  | Th02 | P21761 | Thyrotropin-releasing hormone and Secretagogue | Thyrotropin-releasing hormone receptor      |



|    |    |      |        |                                                |                                            |
|----|----|------|--------|------------------------------------------------|--------------------------------------------|
| IV | 9  | Th02 | Q01717 | Thyrotropin-releasing hormone and Secretagogue | Thyrotropin-releasing hormone receptor     |
| IV | 9  | Th02 | O46639 | Thyrotropin-releasing hormone and Secretagogue | Thyrotropin-releasing hormone receptor     |
| IV | 9  | Th02 | P34981 | Thyrotropin-releasing hormone and Secretagogue | Thyrotropin-releasing hormone receptor     |
| IV | 9  | Th02 | O93603 | Thyrotropin-releasing hormone and Secretagogue | Thyrotropin-releasing hormone receptor     |
| IV | 9  | Th02 | Q28596 | Thyrotropin-releasing hormone and Secretagogue | Thyrotropin-releasing hormone receptor     |
| V  | 10 | Go01 | Q01776 | Gonadotropin-releasing hormone                 | Gonadotropin-releasing hormone I receptor  |
| V  | 10 | Go01 | Q9MZI6 | Gonadotropin-releasing hormone                 | Gonadotropin-releasing hormone I receptor  |
| V  | 10 | Go01 | P30968 | Gonadotropin-releasing hormone                 | Gonadotropin-releasing hormone I receptor  |
| V  | 10 | Go01 | P32236 | Gonadotropin-releasing hormone                 | Gonadotropin-releasing hormone I receptor  |
| V  | 10 | Go01 | O18821 | Gonadotropin-releasing hormone                 | Gonadotropin-releasing hormone I receptor  |
| V  | 10 | Go01 | P32237 | Gonadotropin-releasing hormone                 | Gonadotropin-releasing hormone I receptor  |
| V  | 10 | Go01 | P49922 | Gonadotropin-releasing hormone                 | Gonadotropin-releasing hormone I receptor  |
| V  | 10 | Go01 | Q9TTI8 | Gonadotropin-releasing hormone                 | Gonadotropin-releasing hormone I receptor  |
| V  | 10 | Go01 | Q8CH60 | Gonadotropin-releasing hormone                 | Gonadotropin-releasing hormone I receptor  |
| V  | 10 | Go01 | Q19PY9 | Gonadotropin-releasing hormone                 | Gonadotropin-releasing hormone I receptor  |
| V  | 10 | Go01 | P30969 | Gonadotropin-releasing hormone                 | Gonadotropin-releasing hormone I receptor  |
| V  | 10 | Go02 | Q95MG6 | Gonadotropin-releasing hormone                 | Gonadotropin-releasing hormone II receptor |
| V  | 10 | Go02 | Q95MH6 | Gonadotropin-releasing hormone                 | Gonadotropin-releasing hormone II receptor |
| V  | 10 | Go02 | Q95JG1 | Gonadotropin-releasing hormone                 | Gonadotropin-releasing hormone II receptor |
| V  | 10 | Go02 | O42329 | Gonadotropin-releasing hormone                 | Gonadotropin-releasing hormone II receptor |
| VI | 11 | Ca01 | Q98895 | Cannabinoid                                    | Cannabinoid receptor 1                     |
| VI | 11 | Ca01 | Q71SP5 | Cannabinoid                                    | Cannabinoid receptor 1                     |
| VI | 11 | Ca01 | P21554 | Cannabinoid                                    | Cannabinoid receptor 1                     |
| VI | 11 | Ca01 | O02777 | Cannabinoid                                    | Cannabinoid receptor 1                     |
| VI | 11 | Ca01 | P56971 | Cannabinoid                                    | Cannabinoid receptor 1                     |
| VI | 11 | Ca01 | Q333S9 | Cannabinoid                                    | Cannabinoid receptor 1                     |
| VI | 11 | Ca01 | Q801M1 | Cannabinoid                                    | Cannabinoid receptor 1                     |
| VI | 11 | Ca01 | P47746 | Cannabinoid                                    | Cannabinoid receptor 1                     |
| VI | 11 | Ca01 | Q5IS73 | Cannabinoid                                    | Cannabinoid receptor 1                     |
| VI | 11 | Ca01 | Q9PUI7 | Cannabinoid                                    | Cannabinoid receptor 1A                    |
| VI | 11 | Ca01 | Q98894 | Cannabinoid                                    | Cannabinoid receptor 1B                    |
| VI | 11 | Ca01 | P20272 | Cannabinoid                                    | Cannabinoid receptor 1                     |
| VI | 11 | Ca02 | Q9QZN9 | Cannabinoid                                    | Cannabinoid receptor 2                     |
| VI | 11 | Ca02 | P47936 | Cannabinoid                                    | Cannabinoid receptor 2                     |

|     |    |      |        |                 |                        |
|-----|----|------|--------|-----------------|------------------------|
| VI  | 11 | Ca02 | P34972 | Cannabinoid     | Cannabinoid receptor 2 |
| VII | 13 | Nu22 | A6QLE7 | Nucleotide-like | GPR52                  |
| VII | 13 | Nu22 | Q9Y2T5 | Nucleotide-like | GPR52                  |
| VII | 13 | Nu22 | P0C5J4 | Nucleotide-like | GPR52                  |
| VII | 13 | Nu29 | Q99679 | Nucleotide-like | GPR21                  |
| VII | 13 | Nu29 | Q8BX79 | Nucleotide-like | GPR21                  |

Table S5. 197 GPCR sequences and their clustering of 47 groups predicted by MSClustering, N-J, and Louvain using the distance defined as  $E$  or  $E^{0.02}$ .

| Uniprot ID | MSC 1<br>[ $E$ , $E^{0.02}$ ] | N-J<br>[ $E^{0.02}$ ] | N-J<br>[ $E$ ] | Louvain<br>[ $E^{0.02}$ ] | Louvain<br>[ $E$ ] |
|------------|-------------------------------|-----------------------|----------------|---------------------------|--------------------|
| Q90X46     | Nu17                          | 1                     | 2              | 3                         | 2                  |
| B3DM66     | Nu17                          | 2                     | 2              | 3                         | 2                  |
| B2RPY5     | Nu17                          | 2                     | 2              | 3                         | 2                  |
| Q8N6U8     | Nu17                          | 2                     | 2              | 3                         | 2                  |
| Q2YDN1     | Nu17                          | 2                     | 2              | 3                         | 2                  |
| P79928     | Nu07                          | 3                     | 2              | 2                         | 3                  |
| Q9JJS7     | Nu07                          | 4                     | 2              | 2                         | 3                  |
| P51582     | Nu07                          | 4                     | 2              | 2                         | 3                  |
| O35811     | Nu07                          | 4                     | 2              | 2                         | 3                  |
| Q8BLG2     | Nu28                          | 5                     | 2              | 2                         | 3                  |
| Q99677     | Nu28                          | 5                     | 2              | 2                         | 3                  |
| Q8BMC0     | Nu08                          | 6                     | 9              | 2                         | 3                  |
| P43657     | Nu08                          | 6                     | 9              | 2                         | 3                  |
| Q4G072     | Nu08                          | 6                     | 9              | 2                         | 3                  |
| P32250     | Nu08                          | 6                     | 20             | 2                         | 3                  |
| P30543     | Nu15                          | 7                     | 2              | 3                         | 1                  |
| P29274     | Nu15                          | 7                     | 2              | 3                         | 2                  |
| P11617     | Nu15                          | 7                     | 2              | 3                         | 2                  |
| Q60613     | Nu15                          | 7                     | 2              | 3                         | 2                  |
| Q6TLI7     | Nu15                          | 7                     | 2              | 3                         | 2                  |
| P46616     | Nu15                          | 7                     | 2              | 3                         | 2                  |
| Q60614     | Nu06                          | 8                     | 6              | 3                         | 2                  |
| P29276     | Nu06                          | 8                     | 31             | 3                         | 2                  |
| P29275     | Nu06                          | 8                     | 2              | 3                         | 2                  |
| Q32ZE2     | Nu06                          | 8                     | 2              | 3                         | 2                  |
| Q1LZD0     | Nu06                          | 8                     | 2              | 3                         | 2                  |
| O13076     | Nu06                          | 8                     | 2              | 3                         | 2                  |
| Q6W3F4     | Nu06                          | 8                     | 2              | 3                         | 2                  |
| P49651     | Nu14                          | 9                     | 10             | 2                         | 3                  |
| P34996     | Nu14                          | 9                     | 2              | 2                         | 3                  |
| P49650     | Nu14                          | 9                     | 10             | 2                         | 3                  |
| P49652     | Nu14                          | 9                     | 2              | 2                         | 3                  |
| P47900     | Nu14                          | 9                     | 10             | 2                         | 3                  |
| P48042     | Nu14                          | 9                     | 9              | 2                         | 3                  |
| P59902     | Nu14                          | 9                     | 10             | 2                         | 3                  |
| P41232     | Nu18                          | 10                    | 2              | 2                         | 3                  |
| Q5YA25     | Nu18                          | 10                    | 2              | 2                         | 3                  |
| P41231     | Nu18                          | 10                    | 2              | 2                         | 3                  |

|        |      |    |    |   |   |
|--------|------|----|----|---|---|
| P35383 | Nu18 | 10 | 2  | 2 | 3 |
| Q8BUD0 | Nu16 | 11 | 2  | 2 | 3 |
| Q4KLH9 | Nu16 | 11 | 2  | 2 | 3 |
| Q1JQB3 | Nu16 | 11 | 2  | 2 | 3 |
| P46093 | Nu16 | 11 | 2  | 2 | 3 |
| P50132 | Nu16 | 11 | 2  | 2 | 3 |
| Q8BFQ3 | Nu20 | 12 | 2  | 2 | 3 |
| O46685 | Nu20 | 12 | 2  | 2 | 3 |
| Q15743 | Nu20 | 12 | 2  | 2 | 3 |
| Q8BG55 | Nu23 | 13 | 2  | 2 | 3 |
| Q3ZBK9 | Nu23 | 13 | 2  | 2 | 3 |
| O14626 | Nu23 | 13 | 2  | 2 | 3 |
| Q9ESG6 | Nu02 | 14 | 2  | 2 | 3 |
| Q3SX17 | Nu02 | 14 | 1  | 2 | 3 |
| Q15391 | Nu02 | 14 | 36 | 2 | 3 |
| Q9CPV9 | Nu19 | 15 | 2  | 2 | 3 |
| Q9H244 | Nu19 | 15 | 2  | 2 | 3 |
| Q9EPX4 | Nu19 | 15 | 2  | 2 | 3 |
| Q95KC3 | Nu19 | 15 | 2  | 2 | 3 |
| Q9D8I2 | Nu09 | 16 | 2  | 2 | 1 |
| Q6GUG4 | Nu09 | 16 | 2  | 2 | 3 |
| Q62928 | Pr08 | 17 | 2  | 1 | 1 |
| Q62053 | Pr08 | 17 | 12 | 1 | 1 |
| P43116 | Pr08 | 17 | 18 | 1 | 1 |
| Q9XT82 | Pr08 | 17 | 19 | 1 | 1 |
| P79393 | Pr07 | 18 | 2  | 1 | 1 |
| P43119 | Pr07 | 18 | 2  | 1 | 1 |
| P43252 | Pr07 | 18 | 2  | 1 | 1 |
| P43253 | Pr07 | 18 | 2  | 1 | 1 |
| P28190 | Nu05 | 19 | 6  | 3 | 2 |
| P11616 | Nu05 | 19 | 2  | 3 | 2 |
| P49892 | Nu05 | 19 | 2  | 3 | 2 |
| P34970 | Nu05 | 19 | 2  | 3 | 2 |
| P47745 | Nu05 | 19 | 2  | 3 | 2 |
| Q5RF57 | Nu05 | 19 | 2  | 3 | 2 |
| Q60612 | Nu05 | 19 | 2  | 3 | 2 |
| P30542 | Nu05 | 19 | 2  | 3 | 2 |
| P25099 | Nu05 | 19 | 6  | 3 | 2 |
| Q61618 | Nu26 | 20 | 2  | 3 | 2 |
| Q0VC81 | Nu01 | 20 | 2  | 3 | 2 |
| O02667 | Nu01 | 20 | 2  | 3 | 2 |
| P33765 | Nu01 | 20 | 2  | 3 | 2 |

|        |      |    |    |    |    |
|--------|------|----|----|----|----|
| P35342 | Nu01 | 20 | 2  | 3  | 2  |
| Q28309 | Nu01 | 20 | 2  | 3  | 2  |
| P28647 | Nu26 | 20 | 2  | 3  | 2  |
| Q98907 | Nu25 | 21 | 2  | 2  | 3  |
| Q9ERK9 | Nu10 | 21 | 2  | 2  | 3  |
| O93361 | Nu25 | 21 | 2  | 2  | 3  |
| Q63371 | Nu10 | 21 | 2  | 2  | 3  |
| Q15077 | Nu10 | 21 | 2  | 2  | 3  |
| Q6IYF8 | Nu21 | 22 | 28 | 2  | 3  |
| Q6Y1R5 | Nu21 | 22 | 28 | 2  | 3  |
| Q96P68 | Nu21 | 22 | 37 | 2  | 3  |
| Q98895 | Ca01 | 23 | 2  | 3  | 1  |
| Q71SP5 | Ca01 | 23 | 2  | 3  | 1  |
| P21554 | Ca01 | 23 | 2  | 3  | 1  |
| O02777 | Ca01 | 23 | 2  | 3  | 1  |
| P56971 | Ca01 | 23 | 2  | 3  | 1  |
| Q333S9 | Ca01 | 23 | 2  | 4  | 4  |
| Q801M1 | Ca01 | 23 | 2  | 6  | 6  |
| P47746 | Ca01 | 23 | 2  | 7  | 7  |
| Q5IS73 | Ca01 | 23 | 2  | 8  | 8  |
| Q9PUI7 | Ca01 | 23 | 2  | 9  | 9  |
| Q98894 | Ca01 | 23 | 2  | 11 | 11 |
| P20272 | Ca01 | 23 | 2  | 12 | 12 |
| Q9QZN9 | Ca02 | 24 | 2  | 3  | 2  |
| P47936 | Ca02 | 24 | 35 | 5  | 5  |
| P34972 | Ca02 | 24 | 2  | 10 | 10 |
| Q99MT7 | Nu27 | 25 | 2  | 2  | 3  |
| Q9BY21 | Nu27 | 25 | 2  | 2  | 3  |
| P35375 | Pr01 | 26 | 43 | 1  | 1  |
| P34995 | Pr01 | 26 | 30 | 1  | 1  |
| Q9BGL8 | Pr01 | 26 | 23 | 1  | 1  |
| P70597 | Pr01 | 26 | 24 | 1  | 1  |
| P34978 | Pr10 | 27 | 26 | 1  | 1  |
| Q95125 | Pr02 | 27 | 42 | 1  | 1  |
| P21731 | Pr02 | 27 | 16 | 1  | 1  |
| P30987 | Pr10 | 27 | 27 | 1  | 1  |
| P56486 | Pr02 | 27 | 17 | 1  | 1  |
| Q149R9 | Nu03 | 28 | 2  | 2  | 3  |
| Q3ZC80 | Nu03 | 28 | 2  | 2  | 3  |
| Q9H1C0 | Nu03 | 28 | 2  | 2  | 3  |
| O00398 | Nu13 | 29 | 2  | 2  | 3  |
| Q8BFU7 | Nu13 | 29 | 2  | 2  | 3  |

|        |      |    |    |    |    |
|--------|------|----|----|----|----|
| P43088 | Pr06 | 30 | 45 | 1  | 1  |
| P37289 | Pr06 | 30 | 25 | 1  | 1  |
| P43117 | Pr06 | 30 | 21 | 1  | 1  |
| P43118 | Pr06 | 30 | 22 | 1  | 1  |
| Q28905 | Pr06 | 30 | 25 | 1  | 1  |
| Q61038 | Nu12 | 31 | 47 | 2  | 3  |
| Q8IYL9 | Nu12 | 31 | 2  | 2  | 3  |
| O35881 | Nu02 | 32 | 29 | 2  | 3  |
| Q9BPV8 | Nu09 | 32 | 2  | 2  | 3  |
| O35932 | Pr09 | 33 | 34 | 1  | 1  |
| A5D7K8 | Pr03 | 33 | 33 | 1  | 1  |
| Q13258 | Pr03 | 33 | 46 | 1  | 1  |
| Q9R261 | Pr09 | 33 | 34 | 1  | 1  |
| P70263 | Pr09 | 33 | 38 | 1  | 1  |
| O42329 | Go02 | 34 | 44 | 31 | 31 |
| Q01776 | Go01 | 35 | 2  | 20 | 20 |
| Q9MZI6 | Go01 | 35 | 2  | 21 | 21 |
| P30968 | Go01 | 35 | 10 | 23 | 23 |
| P32236 | Go01 | 35 | 2  | 25 | 25 |
| O18821 | Go01 | 35 | 2  | 26 | 26 |
| P32237 | Go01 | 35 | 2  | 28 | 28 |
| P49922 | Go01 | 35 | 2  | 29 | 29 |
| Q9TTI8 | Go01 | 35 | 2  | 30 | 30 |
| Q8CH60 | Go01 | 35 | 2  | 32 | 32 |
| Q19PY9 | Go01 | 35 | 2  | 33 | 33 |
| P30969 | Go01 | 35 | 40 | 34 | 34 |
| P21556 | Pl01 | 36 | 2  | 13 | 13 |
| Q9TTY5 | Pl01 | 36 | 2  | 14 | 14 |
| Q62035 | Pl01 | 36 | 2  | 15 | 15 |
| Q9XSD4 | Pl01 | 36 | 2  | 16 | 16 |
| P25105 | Pl01 | 36 | 2  | 17 | 17 |
| Q9GK76 | Pl01 | 36 | 2  | 18 | 18 |
| P46002 | Pl01 | 36 | 11 | 19 | 19 |
| Q95MG6 | Go02 | 37 | 14 | 22 | 22 |
| Q95MH6 | Go02 | 37 | 5  | 24 | 24 |
| Q95JG1 | Go02 | 37 | 5  | 27 | 27 |
| P43115 | Pr05 | 38 | 2  | 1  | 1  |
| P50131 | Pr05 | 38 | 2  | 1  | 1  |
| P46069 | Pr05 | 38 | 2  | 1  | 1  |
| P34979 | Pr05 | 38 | 41 | 1  | 1  |
| P34980 | Pr05 | 38 | 12 | 1  | 1  |
| P30557 | Pr05 | 38 | 2  | 1  | 1  |

|        |      |    |    |    |    |
|--------|------|----|----|----|----|
| Q99MT6 | Nu04 | 39 | 2  | 2  | 3  |
| Q6IYF9 | Nu04 | 39 | 5  | 2  | 3  |
| Q9BXA5 | Nu04 | 39 | 13 | 2  | 3  |
| O43193 | Th01 | 40 | 2  | 36 | 36 |
| Q99P50 | Th01 | 41 | 2  | 37 | 37 |
| O08725 | Th01 | 41 | 2  | 35 | 35 |
| A5A4L1 | Th01 | 41 | 2  | 42 | 42 |
| A5A4K9 | Th01 | 41 | 2  | 43 | 43 |
| Q92847 | Th01 | 41 | 32 | 46 | 46 |
| Q95254 | Th01 | 41 | 2  | 47 | 47 |
| P43114 | Pr04 | 42 | 2  | 1  | 1  |
| P32240 | Pr04 | 42 | 2  | 1  | 1  |
| Q95KZ0 | Pr04 | 42 | 2  | 1  | 1  |
| Q8MJ08 | Pr04 | 42 | 2  | 1  | 1  |
| P35408 | Pr04 | 42 | 2  | 1  | 1  |
| Q28691 | Pr04 | 42 | 2  | 1  | 1  |
| Q99679 | Nu29 | 43 | 15 | 3  | 2  |
| A6QLE7 | Nu22 | 43 | 2  | 3  | 2  |
| Q9Y2T5 | Nu22 | 43 | 2  | 3  | 2  |
| P0C5J4 | Nu22 | 43 | 2  | 3  | 2  |
| Q8BX79 | Nu29 | 43 | 2  | 3  | 2  |
| Q9UNW8 | Nu11 | 44 | 39 | 2  | 3  |
| Q9Z282 | Nu11 | 44 | 2  | 2  | 3  |
| Q99678 | Nu24 | 45 | 2  | 2  | 3  |
| Q8BYC4 | Nu24 | 45 | 2  | 2  | 3  |
| P21761 | Th02 | 46 | 4  | 38 | 38 |
| Q01717 | Th02 | 46 | 3  | 39 | 39 |
| O46639 | Th02 | 46 | 4  | 40 | 40 |
| P34981 | Th02 | 46 | 4  | 41 | 41 |
| O93603 | Th02 | 46 | 4  | 44 | 44 |
| Q28596 | Th02 | 46 | 4  | 45 | 45 |
| Q8BZL4 | Nu30 | 47 | 7  | 3  | 2  |
| Q99680 | Nu30 | 47 | 8  | 3  | 2  |

### III. Manual of the MSCLustering app

#### MSCLustering: A Cytoscape tool for multi-level clustering of complex networks

##### 1. Introduction

MSCLustering is a tool for multi-level clustering of complex networks and provides immediate visualization and analyses in the Cytoscape platform. After transforming the  $N^2$ -distance matrix into an  $N$ -list of shortest connections for a system of  $N$  nodes, MSCLustering automatically groups the system hierarchically for several characteristic levels of resolution. It is proportional to the system size in the memory of storage and operations of the algorithm. For a system of 2500 nodes, MSCLustering takes about 27 seconds to perform a hierarchical clustering of the system. The algorithm of this app is efficient (computational time is roughly linear in  $N$ ) and has been successfully applied to study various systems in biology, scientometrics, literature analyses, and finance. It is now integrated with Cytoscape to provide immediate visualization and statistical analyses.

Clustering/classification is an important step in understanding the present diversity and past evolutionary history of a complex system. As many important real-world clustering/classification problems are intrinsically hierarchical, it is desired to develop an efficient clustering tool for the automated clustering of complex systems at various characteristic levels. We have developed the MSCLustering app in Cytoscape for an automated, efficient, and hierarchical clustering of complex networks at various characteristic resolution levels. Here, we have demonstrated that the constructed MSC tree provides phylogenetic information for complex systems from a distance-based approach. An example is the clustering of a 46-coronavirus network in three characteristic levels as shown in the screenshots. The constructed MSC tree is consistent with the best phylogenetic models from the character-based approach using IQTREE.

##### 2. Installation

- Installing Cytoscape: Download and install the latest version of Cytoscape from <https://cytoscape.org/>.
- Installing MSCLustering: Open Cytoscape and select Apps > App Manager from the main menu, as shown in Figure M1. In the App Manager,



select MSClustering in the list of All Apps and click the Install button.

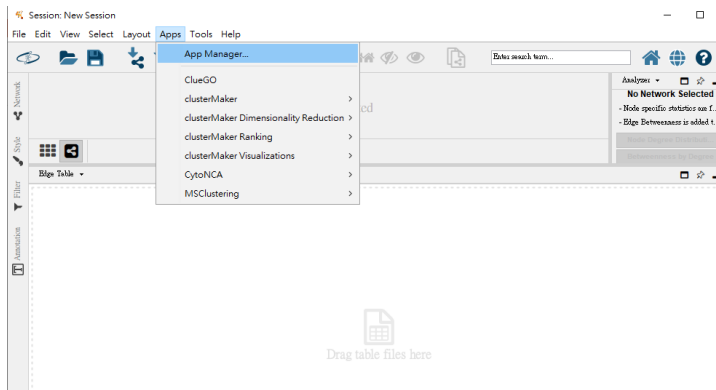

Figure M1. Installing MSClustering in Cytoscape.

### 3. Quick Tutorial

**3.1 Preparing Data Files:** Data files (distance matrix) could be in one of the following formats: .mat, .adj, .txt, .tsv, or .csv. As shown in Figure M2, the first row of the data file contains the outlier detection parameter ( $m$ ) and the smallest number of groups at the highest level ( $N_{\text{limit}}$ ), the second row contains nodes' ID, and the distance matrix is listed below the ID labels. A node is considered an outlier if its shortest distance to other nodes is larger than  $m$  times the median value of the shortest distances. To switch off these two options, just set  $m$  and  $N_{\text{limit}}$  to 0. Sample input files for a coronavirus network and a GPCR network can be downloaded from this [link](#).

| $m$             | $N_{\text{limit}}$ |
|-----------------|--------------------|
| Node IDs        |                    |
| Distance matrix |                    |

Figure M2. The format of the input data file. Here  $m$  is the parameter for outlier detection and  $N_{\text{limit}}$  is the smallest number of groups at the highest level of clustering.

#### 3.2 Importing a data file to the MSClustering

- To create an MSC network go to the Cytoscape main menu and select **Apps > MSClustering > Import Distance Matrix**.

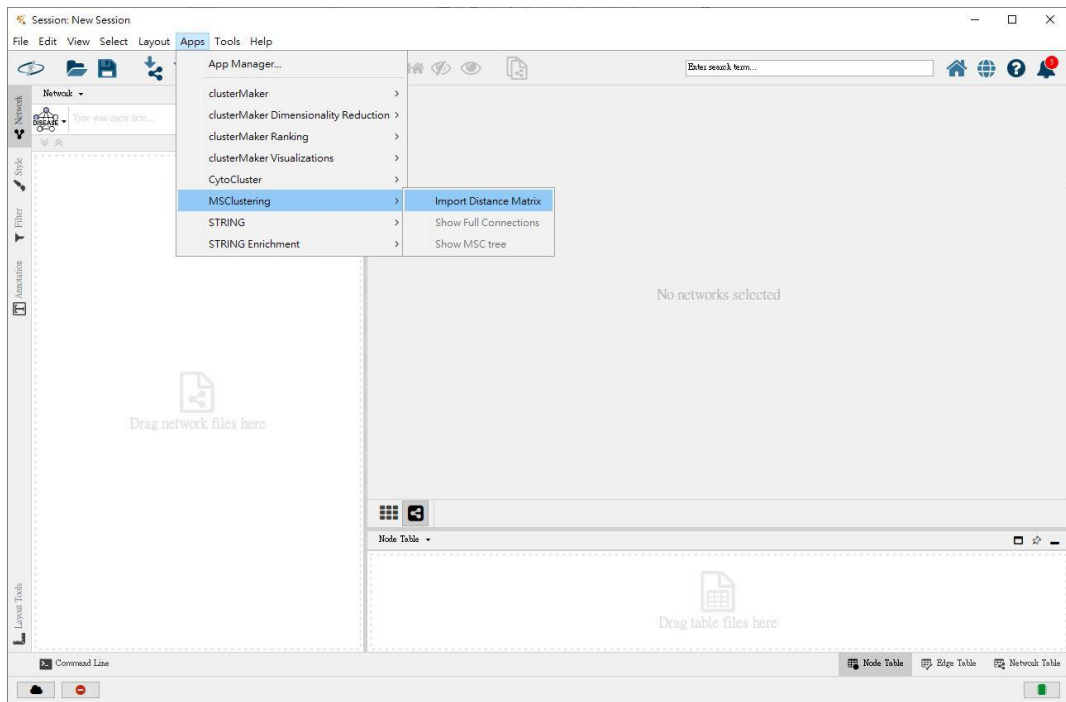

Figure M3. Running MSClustering by reading the input file.

### 3.3 App manipulations

- After importing the distance matrix, MSClustering will automatically cluster the system at various characteristic levels of resolution. Figure M4 shows a typical example consisting of three levels. There are three main areas in the app, including
  1. Network panel, which lists all clustering levels of the network;
  2. Network display, which displays the network diagram at the selected clustering level;
  - and
  3. Expression panel, which shows related data for all nodes and edges.

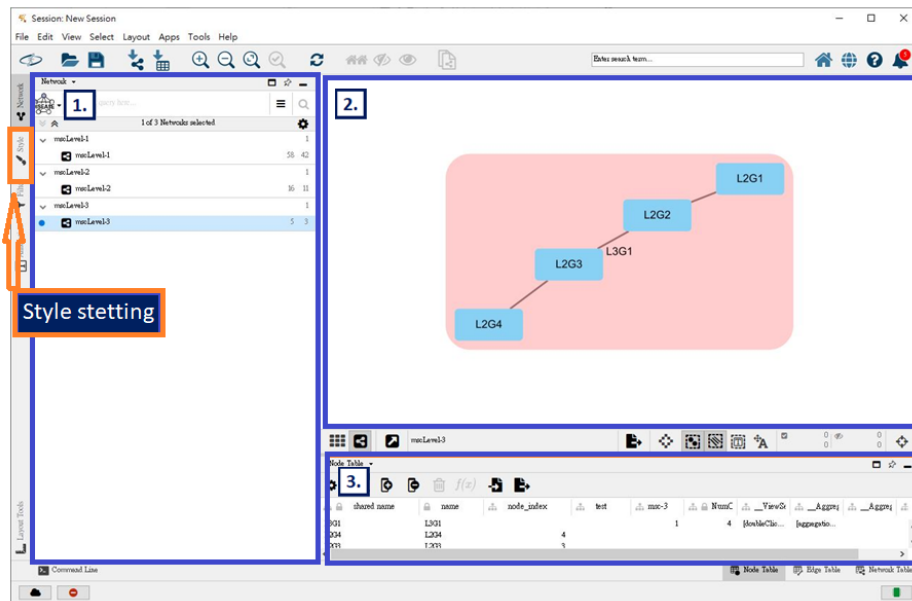

Figure M4.

- Style setting: This is the place to set the style details of the network figure, including 1. Change current style; 2. The setting of details; and 3. Switch for setting nodes, edges, or networks. For more information about Cytoscape styles, please visit <http://manual.cytoscape.org/en/stable/Styles.html>.

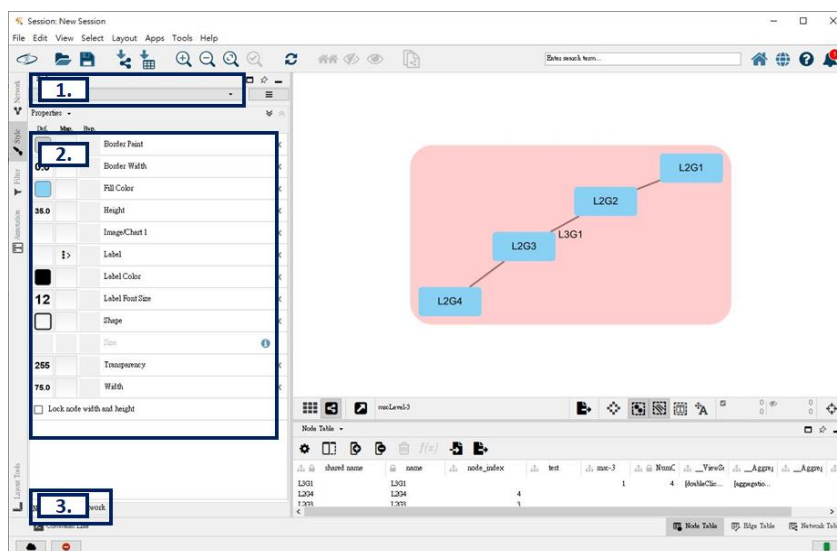

Figure M5.

- Building MSC trees and full connection trees: After clustering the system, the full-connection diagram and the MSC tree can be built from the app menu. Statistical analyses of the network can be performed by incorporating other Cytoscape apps (such as CytoNCA for centrality measures) with MSClustering. For biological networks, the

MSC tree is also a distance-based phylogenetic tree.

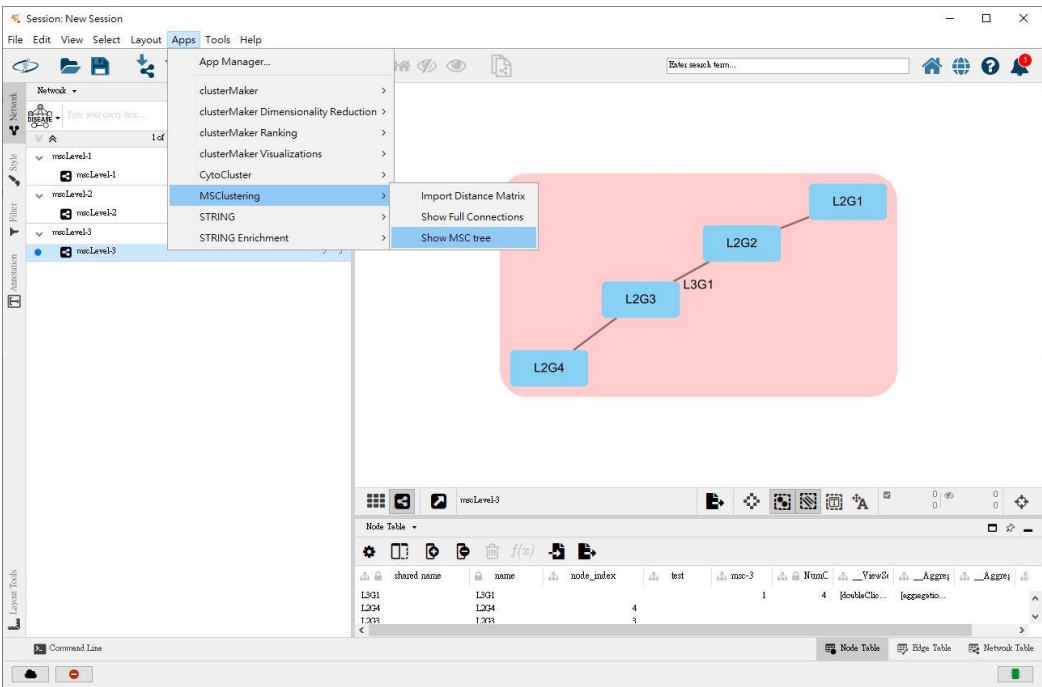

Figure M6.
